# Supplementary material
Source: publisher figshare collection journal article supplement (https://rs.figshare.com/ndownloader/files/45461023)
Supplement: Supplementary file 1 [file 45461023]

SUPPORTING INFORMATION

The Evolution and Ecology of Gigantism in Terror Birds (Aves, Phorusrhacidae)

Thomas W. LaBarge, Jacob D. Gardner, and Chris L. Organ

Table of contents Page

1. Character List and Phylogenetic Analysis 2

2. Body Size Regression Analysis 23

3. Cursoriality Analysis 29

4. Phorusrhacid Systematics 36

5. PANCOVA 47

6. Ancestral State Reconstruction 51

1. Character List and Phylogenetic Analysis

CHARACTER MATRIX

Agnolín’s 2013 matrix [1] returned the best supported and least polytomous phylogram and, therefore, served as the primary framework for a new composite matrix of traits. We then assessed the traits reported by Agnolín [1,2]. Characters 5, 7, 8, 9, 11, 18, 20, 24, 47, 61, 66, 67, 71, 87, 89, 90, 101, and 105 from Agnolín’s [1] matrix were difficult to identify and susceptible to taphonomic bias. We removed these characters from our matrix. We also excluded invariant characters. We revised or excluded incorrectly coded characters within Agnolín’s matrix [1] as noted by Degrange and coauthors [3]. Recently reevaluated characters were removed, which we replaced with their updated counterparts [3,4], and we added additional characters from matrices by Degrange and collaborators [3] and Alvarenga, Chiappe, and Bertelli [4] to account for more recent observations. Furthermore, we updated the cranial characters of *P. longissimus* to reflect the recent discovery and description of new skull material from this taxon [5]. Finally, we developed 22 new cranial characters from the extensive record of skulls reported by previous authors [5,6,7,8,9]. Using photographs and in-text descriptions [8,10,11,12], and the character states reported by Alvarenga and colleagues [4], we added the taxa *Titanis walleri* to the matrix. Likewise, we added *Llallawavis scagliai* using the character states and material descriptions by Degrange and coauthors [3]. In coding *Strigogyps*, *Idiornis*, and *Paracrax*, we utilised only those character states included in Agnolín’s matrices [1,2] as we lacked access to the specimens. We reassessed *Bathornis* when traits were exceptionally clear, referencing Cracraft [13] and Mayr [14]. Using Peregrine falcon skeletons (*Falco peregrinus*) curated by the William R. Adams Zooarchaeology Laboratory at Indiana University Bloomington, we coded *F. peregrinus* as our outgroup taxon.

CHARACTER LIST

1 Upper beak- premaxilla tip: (0) straight or slight curved; (1) strongly curved (Alvarenga et al. [4], character 2)

2 Upper beak- premaxilla height relative to length: (0) short, height is less than the length from premaxilla to nares; (1) tall, height is subequal or greater than the length from premaxilla to nares

3 Upper beak- medially compression: (0) absent; (1) weak; (2) strong

4 Upper beak- maximum sagittal width: (0) subequal to beak height or wider; (1) less than beak height (modified from Degrange et al. [3], character 2)

5 Upper beak- tomial notch: (0) absent; (1) weak; (2) strong

6 Upper beak- ventral margin of beak ventrally projected: (0) absent or weak; (1) strong, expanded significantly past jugal bar

7 Upper beak- rostral length (craniofacial hinge to premaxilla): (0) anteroposteriorly short; (1) elongated (Agnolín [1], character 2)

8 Upper beak- palate: (0) schizognathal; (1) desmognathal (Agnolín [1], character 27)

9 Upper beak- palatine crista lateralis: (0) very extended ventrally; (1) poorly extended ventrally (Degrange et al. [3], character 25)

10 Upper beak- palatine rostral process: (0) absent or poorly developed; (1) present (Degrange et al. [3], character 26)

11 Upper beak- palatines: (0) weak; (1) thickened and in the form of "U" in cross section (Agnolín [1], character 102)

12 Upper beak- palatal and jugal flexor zones: (0) present; (1) absent due to merger (Agnolín [1], character 110)

13 Upper beak- palate basipterygoid articulation: (0) present; (1) absent (Degrange et al. [3], character 27)

14 Upper beak- excavated region anterior to nasal: (0) absent or weakly excavated (1) strongly excavated

15 Nasal- (0) straight or weakly convex above the outer nostrils; (1) well convex over the outer nostrils (Agnolín [1], character 4)

16 Nasal- shape of nasal sinus: (0) lenticular, ovoid, or kidney-shaped; (1) triangular or tear drop shaped (modified from Degrange et al. [3], character 11)

17 Nasal- prenarial fossa: (0) present; (1) absent (Degrange et al. [3], character 22)

18 Nasal- placement of nares: (0) anterior quarter of skull; (1) anterior third of skull; (2) midpoint

19 Nasal- maximum height of nasal sinus divided by length: (0) less than 0.2; (1) greater than 0.2

20 Nasal- maximum height of nasal sinus: (0) less than maximum sagittal width of beak (1) greater than maximum sagittal width of beak

21 Nasal- ventral margin of nares: (0) horizontal or near horizontal; (1) strongly deflected anteroventrally

22 Nasal- dorsal margin of nares strongly deflected anteroventrally: (0) absent; (1) present

23 Nasal- major axis of nares strongly deflected anteroventrally: (0) absent; (1) present

24 Nasal- shape of nasal sinus: (0) strongly tapering at one end; (1) elliptical or near circular

25 Nasal- contact between anteroventral and anterodorsal margins of nasal sinus: (0) rounded; (1) angular and sharp

26 Nasal- contact between posterodorsal and posteroventral margins of nasal sinus: (0) rounded; (1) angular and sharp

27 Nasal- nasal sinus: (0) distal to antorbital fossa with limited contact; (1) proximal to antorbital fossa, with the border deliminating the nasal sinus

28 Jugal bar- quadratojugal: (0) thin; (1) robust (modified from Agnolín [1], character 23)

29 Jugal bar- height and width: (0) not twice tall as wide; (1) twice tall as wide; (2) more than twice tall as wide (Alvarenga et al. [4], character 14)

30 Jugal bar- postorbital process of the quadrate: (0) short and thin; (1) tall and robust (Agnolín [1], character 26)

31 Jugal bar- processus lateralis mandibulae of fossa articularis quadratica: (0) very developed; (1) poorly developed (Degrange et al. [3], character 34)

32 Jugal bar- dorsoventral expansion of quadratojugal: (0) no expansion (1) expanded anteriorly near join with os jugale proper (2) expanded caudally

33 Jugal bar- maximum height of quadratojugal: (0) subequal to caudal condyle (1) larger than caudal condyle

34 Cranium- supraorbital processes with a large caudal extension: (0) absent; (1) present (Agnolín [1], character 10)

35 Cranium- supraorbital processes of the lacrimals in contact with the orbital edge of the frontals: (0) present; (1) absent (Degrange et al. [3], character 18)

36 Cranium- lacrimal bone: (0) free; (1) strongly fused to the maxillas and nasals (Agnolín [1], character 103)

37 Cranium- os lacrimale communicens sutured to the jugal bar: (0) absent; (1) present (Agnolín [1], character 104; Degrange et al. [3], character 20)

38 Cranium- frontal-lacrimal fusion: (0) absent; (1) present; (2) present but detached caudally (modified from Degrange et al. [3], character 16)

39 Cranium- posterior margin of maxillopalatine process. in lateral view: (0) deflected anteriorly; (1) straight

40 Cranium- total contour of the antorbital fossa: (0) triangular; (1) pentagonal/almond shaped; (2) quadrilateral

41 Cranium- crista nuchalis transversa: absent (0); present, thin and sharp (1); stout and rounded (2) (Degrange et al. [3], character 8)

42 Cranium- frontoparietal table: (0) convex; (1) flat (Agnolín [1], character 22)

43 Cranium- frontal region: (0) pentagonal; (1) triangular (Degrange et al. [3], character 5)

44 Cranium- zona flexoria craniofacialis: (0) present; (1) absent (Degrange et al. [3], character 12)

45 Cranium- zona flexoria palatina: (0) present; (1) absent (Degrange et al. [3], character 13)

46 Cranium- zona flexoria arcus jugalis: (0) present; (1) absent (Degrange et al. [3], character 14)

47 Cranium- medial fusion of the maxillopalatine process: (0) present; (1) absent (Degrange et al. [3], character 23)

48 Cranium- frontal: (0) anteroposteriorly elongated with consistent width; (1) shortened anteroposteriorly and narrowed posteriorly (Agnolín [1], character 16)

49 Occipital- postorbital: (0) smooth or weakly convex; (1) subdivided by a deep subvertical medial ridge (Agnolín [1], character 12)

50 Occipital- temporal fossae: (0) distant in dorsal view; (1) practically in contact in dorsal view (Agnolín [1], character 13)

51 Occipital- temporal fossae: (0) anteroposteriorly extensive; (1) anteroposteriorly compressed (Agnolín [1], character 14)

52 Occipital- subtemporal fossa: (0) reduced; (1) wide, deep, and delimited posteriorly by the lambdoid ridge (Agnolín [1], character 15)

53 Occipital- orientation of occipital condyle: (0) posteroventrally or ventrally; (1) lateral (subhorizontal) (Agnolín [1], character 19)

54 Occipital- occipitals projecting severely laterally, past the postorbitals: (0) absent; (1) present (modified from Agnolín [1], character 21)

55 Occipital- pterygoid with articulation process for the basipterygoid process: (0) absent; (1) present (Degrange et al. [3], character 28)

56 Occipital- fonticulis occipitalis: (0) present; (1) absent (Degrange et al. [3], character 4)

57 Occipital- posterior contour of parietal in lateral view: (0) round; (1) angular; (2) projecting caudally

58 Mandible- synthesis: (0) ventrally curved; (1) straight; (2) dorsally curved (Degrange et al. [3], character 32)

59 Mandible- mandibular fenestrae anteroposteriorly extensive: (0) absent; (1) present (Agnolín [1], character 30)

60 Mandible- mandibular fenestra: (0) single; (1) multiple (modified from Agnolín [1], 31 and Degrange et al. [3], character 33)

61 Mandible- mandibular symphysis: (0) short and gracile; (1) elongated and robust (Agnolín [1], character 32)

62 Mandible- ventral expansion: (0) absent; (1) weak; (2) strong

63 Mandible- mandibular fenestrae dorsoventrally high: (0) absent (1) present

64 Vertebrae and ribs- osseous bridge on third cervical vertebra linking the processus transversus to processus articularis (postzygapophysis) making a dorsal fenestra: (0) absent; (1) present (Degrange et al. [3], character 36)

65 Vertebrae and ribs- dorsal ribs: (0) with uncinate processes; (1) without uncinate processes (Agnolín [1], character 34)

66 Vertebrae and ribs- cervical vertebrae anterior to the seventh: (0) longer than wide; (1) as wide or wider than long (Agnolín [1], character 35)

67 Vertebrae and ribs- bifurcate neural spines in cervical vertebrae: (0) absent; (1) present (Degrange et al. [3], character 37)

68 Vertebrae and ribs- a large recessus pneumaticus in the mid centrum of thoracic vertebrae: (0) absent; (1) present (Alvarenga et al. [4], character 22)

69 Pectoral girdle- acrocoracoidal process; (0) present; (1) absent (Alvarenga et al. [4], character 29)

70 Pectoral girdle- coracoid, scapula, and furcula: (0) Free; (1) merged (Agnolín [1], character 39)

71 Pectoral girdle- brachial tuberosity contacting procoracoid processes: (0) absent, (1) present (modified from Agnolín [1], character 40)

72 Pectoral girdle- procoracoid processes: (0) well developed; (1) poorly developed or absent (Degrange et al. [3], character 41)

73 Pectoral girdle- scapular face of the coracoid: (0) dorsoventrally high and transversely compressed; (1) dorsoventrally compressed and transversally extensive (Agnolín [1], character 42)

74 Pectoral girdle- coracoid fused to claviculae: (0) absent; (1) present (Alvarenga et al. [4], character 31)

75 Pectoral girdle- acromion cranially projected: (0) absent; (1) present (Degrange et al. [3], character 45)

76 Sternum- caudal margin: (0) with one pair of incisions; (1) without incisions (Degrange et al. [3], character 40)

77 Pelvic girdle- preacetabular region: (0) not compressed laterally; (1) compressed laterally (Degrange et al. [3], character 55)

78 Pelvic girdle- tuberculum preacetabulare: (0) very developed; (1) absent or poorly developed (Degrange et al. [3], character 58)

79 Pelvic girdle- lateral projection of supratrochanteric crest: (0) more projected than the antitrochanter; (1) less projected than the antitrochanter (Degrange et al. [3], character 60)

80 Pelvic girdle- preacetabular edge of crista iliaca dorsalis: (0) straight; (1) curved, forming a bow (Degrange et al. [3], character 57)

81 Pelvic girdle- pars preacetabularis ilii: (0) fused only in the top of spinous process of synsacral vertebrae; (1) fused in the top and lateral face of spinous process of synsacral vertebrae (Alvarenga et al. [4], character 45)

82 Pelvic girdle- postacetabulum compressed laterally: (0) absent; (1) present (Degrange et al. [3], character 56)

83 Forelimb- humerus, length: (0) longer than scapular length; (1) subequal or shorter than the scapular length (Agnolín [1], character 53)

84 Forelimb- humerus, with a strong medial curvature in its proximal sector: (0) absent; (1) present (Agnolín [1], character 54)

85 Forelimb- humerus, incisura intercondylaris: (0) present; (1) absent or poorly developed (Degrange et al. [3], character 50)

86 Forelimb- humerus, deep and very well defined bicipital groove wide: (0) absent; (1) present (Agnolín [1], character 56)

87 Forelimb- humerus, ligamentary sulcus: (0) well defined and deep; (1) poorly defined and superficial (Agnolín [1], character 57)

88 Forelimb- humerus, fossa olecrani: (0) absent or poorly excavated; (1) present and deep (Degrange et al. [3], character 51)

89 Forelimb- humerus, processus flexorius projected distally: (0) absent; (1) present (Alvarenga et al. [4], character 39)

90 Forelimb- humerus, fossa m. brachialis: (0) shallow; (1) deep (Degrange et al. [3], character 47)

91 Forelimb- humerus, distal end strongly oblique in relation to longitudinal axis of the shaft: (0) absent; (1) present (Degrange et al. [3], character 49)

92 Forelimb- ulna, olecranon: (0) tall and sharp; (1) low and rounded (Agnolín [1], character 62)

93 Forelimb- ulna, external ring of carpal trochlea: (0) rounded; (1) sharply elevated between the metacarpal III and the pisiform process (Agnolín [1], character 63)

94 Forelimb- carpometacarpus, metacarpal I: (0) gracile and subquadrangular; (1) robust, rounded and protruding (Agnolín [1], character 64)

95 Forelimb- carpometacarpus, distal extensor process: (0) acute; (1) truncated (Agnolín [1], character 68)

96 Forelimb- carpometacarpus, os metacarpale minus more extended distally than the os metacarpale major: (0) present; (1) absent (Degrange et al. [3], character 53)

97 Hindlimb- femur, length: (0) shorter than humerus; (1) equal or longer (Alvarenga et al. [4], character 48)

98 Hindlimb- femur, linea intermuscularis cranialis: (0) well marked; (1) absent or tenuous (Degrange et al. [3], character 68)

99 Hindlimb- femur, length: (0) shorter than tarsometatarsus; (1) equal or longer (Alvarenga et al. [4], character 47)

100 Hindlimb- femur, diaphysis: (0) curved, with convex caudal surface; (1) straight, with the flat caudal surface (Agnolín [1], character 106)

101 Hindlimb- femur, osseous bar uniting the lateral and medial condyli, limiting caudodistally the popliteal fossa: (0) present; (1) absent (Degrange et al. [3], character 70)

102 Hindlimb- femur, fossa poplitea: (0) shallow; (1) deep (Degrange et al. [3], character 69)

103 Hindlimb- tibiotarsus, tubercle laterodistally located to the pons supratendineus: (0) present and very developed; (1) absent or poorly developed (Degrange et al. [3], character 72)

104 Hindlimb- tibiotarsus, with cranial cnemial crest hypertrophied and strongly directed proximally: (0) absent; (1) present (Agnolín [1], character 73)

105 Hindlimb- tibiotarsus, pons supratendineus with distal lip: (0) present; (1) absent (Degrange et al. [3], character 71)

106 Hindlimb- tibiotarsus, with the distal margin of the supratendinous bridge: (0) subparallel to the major axis of the bone; (1) oblique, at an angle of 45° with respect to the major axis of the bone (Agnolín [1], character 75)

107 Hindlimb- tibiotarsus, with wide intercondylar incisura: (0) absent; (1) present (Agnolín [1], character 76)

108 Hindlimb- tibiotarsus, with distal condyles well compressed lateromedially: (0) absent; (1) present (Agnolín [1], character 77)

109 Hindlimb- tibiotarsus, distal end with the medial condyle anteroposteriorly expanded: (0) absent; (1) present (Agnolín [1], character 78)

110 Hindlimb- tibiotarsus, distal rim of condylus medialis distinctly notched: (0) absent; (1) present (Alvarenga et al. [4], character 51)

111 Hindlimb- tibiotarsus, condylus medialis medially deflected: (0) absent; (1) present (Alvarenga et al. [4], character 52)

112 Hindlimb- tarsometatarsus, length: (0) very short (tarsometatarsus length/tibiotarsus length less than 0.6); (1) relatively short (tarsometatarsus length/tibiotarsus length between 0.8 and 0.6); (2) extremely elongated (tarsometatarsus length/tibiotarsus length greater than 0.8 (modified from Agnolín [1], character 81)

113 Hindlimb- tarsometatarsus, anteroposteriorly compressed: (0) absent; (1) present (Agnolín [1], character 82)

114 Hindlimb- tarsometatarsus, lateral cotyle: (0) rounded; (1) subrectangular (Agnolín [1], character 83)

115 Hindlimb- tarsometatarsus, hypotarsus: (0) with hypotarsal channels and/or grooves; (1) simple and solid, without channels or grooves (modified from Agnolín [1], character 84)

116 Hindlimb- tarsometatarsus, plantar crests: (0) weakly developed; (1) present and strongly developed (Agnolín [1], character 85)

117 Hindlimb- tarsometatarsus, distal trochlea: (0) subparallel; (1) divergent (Agnolín [1], character 86)

118 Hindlimb- tarsometatarsus, trochlea III: (0) strongly concave and with acute trochlear ridges in anterior and posterior views; (1) practically smooth anteriorly and of acute trochlear ridges only in posterior view (Agnolín [1], character 88)

119 Hindlimb- tarsometatarsus, dorsomedial expansion on the articular surface of middle trochlea (in dorsal view): (0) absent; (1) present (Alvarenga et al. [4], character 58)

120 Hindlimb- tarsometatarsus, trochlea metatarsi II, with posteromedial projection: (0) very developed; (1) absent or poorly developed (Degrange et al. [3], character 82)

121 Hindlimb- tarsometatarsus, foramina vascularia proximalia, position: (0) same level; (1) different level (Degrange et al. [3], character 80)

122 Hindlimb- tarsometatarsus, distal end in distal view: (0) trochlea practically at the same level; (1) trochlea II and IV strongly directed posteriorly, so that the distal end of the tarsometatarsal distal view has a "U" shape (Agnolín [1], character 92)

123 Hindlimb- tarsometatarsus, posterior processes of trochlea II and IV: (0) absent or reduced; (1) well developed (Agnolín [1], character 93)

124 Hindlimb- tarsometatarsus, lateral border of trochlea IV: (0) directed posteriorly; (1) directed posterolaterally (Agnolín [1], character 94)

125 Hindlimb- tarsometatarsus, ratio of total length and width of middle of diaphysis: (0) less than 12; (1) greater than 12 (Degrange et al. [3], character 74)

126 Hindlimb- tarsometatarsus, proximal edges of hypotarsus caudally projected: (0) present; (1) absent (Degrange et al. [3], character 79)

127 Hindlimb- tarsometatarsus, shaft width: (0) constant along the whole shaft; (1) distally narrowed (Degrange et al. [3], character 75)

128 Hindlimb- tarsometatarsus, furrow in the base of the eminentia intercotylaris: (0) present; (1) absent (Degrange et al. [3], character 77)

129 Hindlimb- tarsometatarsus, triangular hypotarsus: (0) absent; (1) present and symmetric; (2) present and asymmetric (with one of its flanges more projected laterally) (Degrange et al. [3], character 78)

130 Hindlimb- tarsometatarsus, trochlea II in dorsal view: (0) deflected medially; (1) almost parallel to the trochlea III; (2) articular surface extended medially (Degrange et al. [3], character 81)

131 Hindlimb- pes, proximal joint facet of proximal pedal phalanges: (0) width greater than heightigh; (1) height greater than width (Agnolín [1], character 95)

132 Hindlimb- pes, hallux: (0) well developed; (1) reduced (Agnolín [1], character 96)

133 Hindlimb- pes, preungual phalanges of digits II and III: (0) elongated; (1) short and sturdy (Agnolín [1], character 98)

134 Hindlimb- pes, phalanges: (0) phalanx 4-IV shorter than or subequal to phalanx 3-IV; (1) phalanx 4-IV longer than phalanx 3-IV (Agnolín [1], character 100)

PHYLOGENETIC ANALYSIS

Using a 5,000,000-generation Markov-chain Monte Carlo (MCMC), sampling every 1,000 generations, we generated a Bayesian posterior distribution of 5,000 trees in MrBayes 3.2.7 [15]. Trees were sampled using two simultaneous runs, each employing four MCMC chains. We discarded the first 1,250 sampled generations (25%) as burn-in. We allowed rates to vary using the gamma rates parameter, applied across an unpartitioned character set. We obtained the last appearance datum (LAD) for each taxon from the Paleobiology Database and independently verified ages with a literature review [3,8,16,17,18]. We assigned these LAD values to their corresponding species as tip-date calibrations. We calibrated the tree root to the estimated root age of Australaves (64.65 Ma), as reported by Kuhl and coauthors [19]. For the root of Cariamiformes, we calibrated the node age to the LAD of the oldest known member of Cariamiformes, *Gradiornis walbeckensis* (59.2 Ma), exponentially offset to the mean age of the Walbeck formation (60.4 Ma) [20]. Node age priors at the tips were fixed. We clock-constrained branch lengths under a uniform prior distribution. The clock rate prior was set to a normal distribution, centred at 0.1 with a standard deviation of 0.1. Our outgroup taxon was *Falco peregrinus*, reflecting the modern molecular taxonomy of Neoaves [19,21,22]. Prior to completing analysis, we verified that the average standard deviation of split frequencies between the runs fell below 0.01. To ensure convergence, we checked the results of the two independent runs using Tracer 1.7 [23] (Figure 1A). All parameters in the phylogenetic inference had effective sample size values over 400, indicating adequate posterior sampling during the MCMC.

Figure 1A. Tracer plot of log marginal likelihood for two simultaneous runs. First 25% of trees (grey) discarded as burn-in.

PHYLOGENETIC POSITION OF *BRONTORNIS*

We conducted a second phylogenetic analysis including *Brontornis burmeisteri*. *B. burmeisteri* was coded into our dataset, using Alvarenga and colleagues’ [4] character states and using photographs and descriptions from the literature [4,8,24,25]. The same parameters were used for this analysis as before, other than the inclusion of *B. burmeisteri* in the matrix along with the accompanying tip-date prior. We then generated a majority-rule consensus tree (summarised as a cladogram) to compare with our original matrix (Figure 1B).


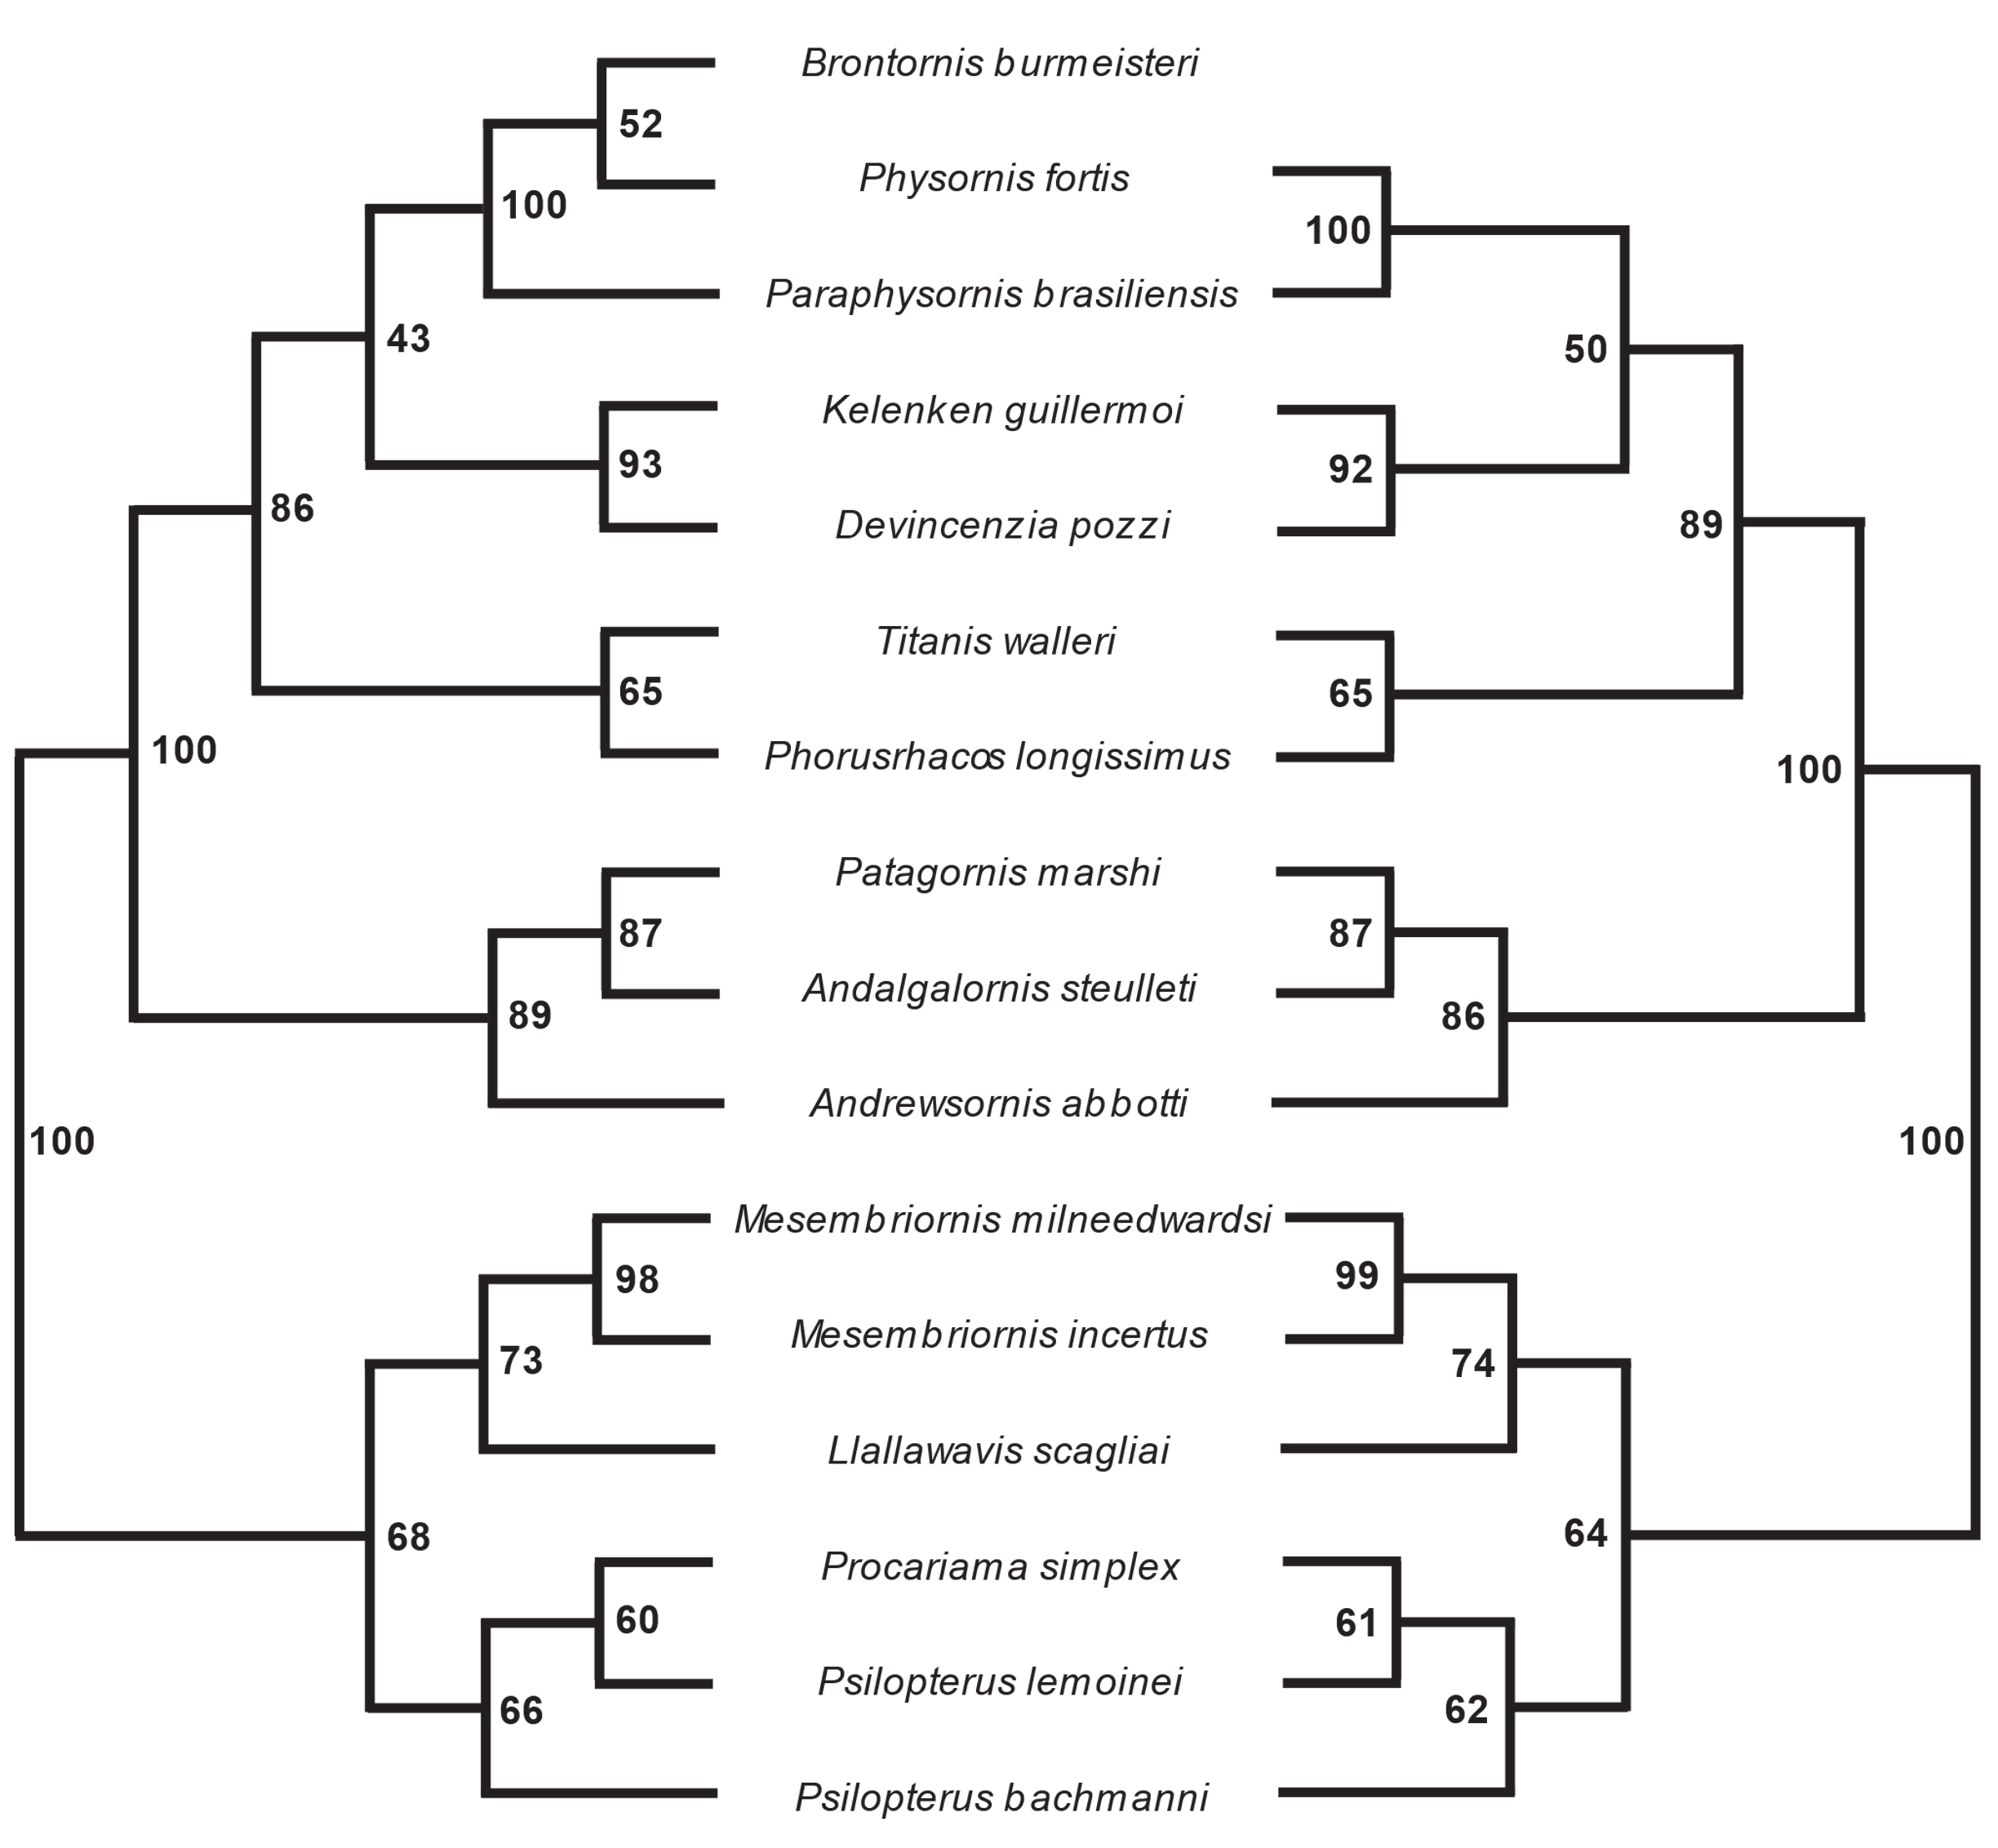


Figure 1B. Comparison of phylogenetic results including *B. burmeisteri* (left) with original phylogenetic results (right). Posterior probabilities reported at nodes.

REFERENCES

1. Agnolín FL. 2013 La posición sistemática de Hermosiornis (Aves, Phororhacoidea) y sus implicancias filogenéticos. Revista del Museo Argentino de Ciencias Naturales 15, 39–60.

2. Agnolín FL. 2009 Sistemática y Filogenia de las Aves Fororracoideas (Gruiformes, Cariamae). Monografías Fundación Azara, 79.

3. Degrange FJ, Tambussi CP, Taglioretti ML, Dondas A, Scaglia F. 2015 A new Mesembriornithinae (Aves, Phorusrhacidae) provides new insights into the phylogeny and sensory capabilities of terror birds. Journal of Vertebrate Paleontology 35, e912656. (doi:10.1080/02724634.2014.912656)

4. Alvarenga HMF, Chiappe L, Bertelli S. 2011 Phorusrhacids: the Terror Birds. In Living Dinosaurs, pp. 187–208. John Wiley & Sons, Ltd. (doi:10.1002/9781119990475.ch7)

5. Degrange FJ, Eddy D, Puerta P, Clarke J. 2019 New skull remains of Phorusrhacos longissimus (Aves, Cariamiformes) from the Miocene of Argentina: implications for the morphology of Phorusrhacidae. Journal of Paleontology 93, 1–13. (doi:10.1017/jpa.2019.53)

6. Degrange FJ. 2021 A Revision of Skull Morphology In Phorusrhacidae (Aves, Cariamiformes). Journal of Vertebrate Paleontology 40, e1848855. (doi:10.1080/02724634.2020.1848855)

7. Degrange FJ. 2012 Morfología del cráneo y complejo apendicular posterior de aves fororracoideas: implicancias en la dieta y modo de vida. Ph.D., Universidad Nacional de La Plata, La Plata, Argentina. See https://repositoriosdigitales.mincyt.gob.ar/vufind/Record/NATURALIS_53bc4bd9553a12c81d6ab90b5b754ae7.

8. Alvarenga HMF, Höfling E. 2003 Systematic revision of the Phorusrhacidae (Aves: Ralliformes). Papéis Avulsos de Zoologia 43, 55–91. (doi:10.1590/S0031-10492003000400001)

9. Alvarenga HMF. 1982 Uma gigantesca ave fossil do cenozoico Brasileiro: Physornis brasiliensis sp. n. Anais da Academia Brasileira de Ciencias 544, 697–712.

10. Chandler RM. 1994 The wing of Titanis walleri (Aves: Phorusrhacidae) from the late Blancan of Florida. Bulletin of the Florida Museum of Natural History 36, 175–180.

11. Baskin JA. 1995 The giant flightless bird Titanis walleri (Aves: Phorusrhacidae) from the Pleistocene coastal plain of south Texas. Journal of Vertebrate Paleontology 15, 842–844. (doi:10.1080/02724634.1995.10011266)

12. Gould GC, Quitmyer IR. 2005 Titanis walleri: Bones of contention. Bulletin of the Florida Museum of Natural History 45, 201–229.

13. Cracraft J. 1968 A Review of the Bathornithidae (Aves, Gruiformes), with Remarks on the Relationships of the Suborder Cariamae. American Museum Novitates 2326.

14. Mayr G. 2016 Osteology and phylogenetic affinities of the middle Eocene North American Bathornis grallator—one of the best represented, albeit least known Paleogene cariamiform birds (seriemas and allies). Journal of Paleontology 90, 357–374. (doi:10.1017/jpa.2016.45)

15. Ronquist F, Huelsenbeck JP. 2003 MRBAYES 3: Bayesian phylogenetic inference under mixed models. Bioinformatics 19, 1572–1574.

16. MacFadden B, Labs-Hochstein J, Hulbert R, Baskin J. 2007 Revised age of the late Neogene terror bird (Titanis) in North America during the Great American Interchange. Geology 35, 123–126. (doi:10.1130/G23186A.1)

17. Alvarenga HMF, Jones W, Rinderknecht A. 2010 The youngest record of phorusrhacid birds (Aves, Phorusrhacidae) from the late Pleistocene of Uruguay. Neues Jahrbuch für Geologie und Paläontologie - Abhandlungen 256, 229–234. (doi:10.1127/0077-7749/2010/0052)

18. Jones W, Rinderknecht A, Alvarenga HMF, Montenegro F, Ubilla M. 2018 The last terror birds (Aves, Phorusrhacidae): new evidence from the late Pleistocene of Uruguay. Paläontologische Zeitschrift 92, 365–372. (doi:10.1007/s12542-017-0388-y)

19. Kuhl H, Frankl-Vilches C, Bakker A, Mayr G, Nikolaus G, Börno S, Klages S, Timmermann B, Gahr M. 2020 An Unbiased Molecular Approach Using 3′-UTRs Resolves the Avian Family-Level Tree of Life. Molecular biology and evolution 38, 108–127. (doi:10.1093/molbev/msaa191)

20. Mayr G. 2007 The birds from the Paleocene fissure filling of Walbeck (Germany). Journal of Vertebrate Paleontology 27, 394–408. (doi:10.1671/0272-4634(2007)27[394:TBFTPF]2.0.CO;2)

21. Jarvis ED et al. 2014 Whole-genome analyses resolve early branches in the tree of life of modern birds. Science 346, 1320–1331. (doi:10.1126/science.1253451)

22. Prum RO, Berv JS, Dornburg A, Field DJ, Townsend JP, Lemmon EM, Lemmon AR. 2015 A comprehensive phylogeny of birds (Aves) using targeted next-generation DNA sequencing. Nature 526, 569–573. (doi:10.1038/nature15697)

23. Rambaut A, Drummond A, Xie D, Baele G, Suchard M. 2018 Posterior summarization in Bayesian phylogenetics using Tracer 1.7. Systematic Biology 67, 901–904. (doi:10.1093/sysbio/syy032)

24. Buffetaut E. 2014 Tertiary ground birds from Patagonia (Argentina) in the Tournouër collection of the Muséum National d’Histoire Naturelle, Paris. Bulletin de la Société Géologique de France 185, 207–214. (doi:10.2113/gssgfbull.185.3.207)

25. Agnolín FL. 2007 Brontornis burmeisteri Moreno & Mercerat, un Anseriformes (Aves) gigante del Mioceno Medio de Patagonia, Argentina. Revista Museo Argentino Ciencias Naturales 9, 15–25.

2. Body Size Regression Analysis

PHORUSRHACID BODY SIZE METRICS

Fossil measurements were recovered from the literature or measured from photographs (indicated by an asterisk) (S1 Excel). We evaluated each metric for its potential to be used in our analysis, comparing the better sampled metrics to Femur Length (FL) which is an already established metric for avian body mass [1]. Reported here are the average measurements for the metrics we assessed: Femur Distal Width (FDW), Tarsometatarsus Proximal Width (TMTPW); and Tarsometatarsus Trochlea III Width (TMTIIIW) (Table 2A).

Table 2A. Averaged body size correlated metrics.

| Genus | Species | FL | FDW | TMTPW | TMTIIIW |
| --- | --- | --- | --- | --- | --- |
| *Psilopterus* | *affinis* | - | - | 2.094 | 0.882 |
| *Psilopterus* | *bachmanni* | 11.725 | 2.659 | 1.979 | 1.008 |
| *Psilopterus* | *lemoinei* | 14.385 | 3.112 | 2.534 | 1.046 |
| *Psilopterus* | *colzecus* | - | - | - | 1.214 |
| *Procariama* | *simplex* | 15.530 | 3.397 | 2.931 | 1.404 |
| *Mesembriornis* | *incertus* | - | - | 4.454 | 2.1 |
| *Mesembriornis* | *milneedwardsi* | 25.865 | 7.681 | 5.986 | 2.7 |
| *Llallawavis* | *scagliai* | 18.469 | 4.842 | 3.982 | 1.720* |
| *Andrewsornis* | *abbotti* | 20.316 | - | - | - |
| *Patagornis* | *marshi* | 21.71 | 5.969 | 4.309 | 1.9 |
| *Andalgalornis* | *steulleti* | - | 5.2 | - | - |
| *Phorusrhacos* | *longissimus* | 31 | 9.183 | 8.705 | 3.367 |
| *Kelenken* | *guillermoi* | - | - | 9.77** | 4.196** |
| *Devincenzia* | *pozzi* | - | - | 11 | 4.55 |
| *Titanis* | *walleri* | - | - | - | 3.6 |
| *Paraphysornis* | *brasiliensis* | 35 | 12.6 | 9.274 | 4.3 |
| *Physornis* | *fortis* | - | 14.8 | 10.52 | - |

All values reported in centimetres.

*The measurement reported here was obtained from photographs reported by Degrange [2,3] and Degrange and colleagues [4], measured using ImageJ V1.52 [5]. This value is reported here and utilised for comparison but was excluded from the initial regression analysis.

**The TMTPW measurements reported by Degrange [2,3] for *K. guillermoi* were significantly larger than the measurement reported by Bertelli, Chiappe, and Tambussi [6] (S1 Excel). We find that the measurements reported by Bertelli, Chiappe, and Tambussi [6] are closer to those depicted in the images provided by Degrange [2] and Bertelli, Chiappe, and Tambussi [6]. Degrange [2,3] also did not report TMTIIIW, thus we report and utilise only the Bertelli, Chiappe, and Tambussi [6] measurements, maintaining the proportional relationship between TMTPW and TMTIIIW as needed in our regression.

REGRESSION ANALYSIS

Regression analysis was completed in BayesTraits V4.0 [7]. Only direct measurements were utilised in regression analyses, excluding measurements taken from photographs. Markov-chain Monte Carlo (MCMC) simulations were run for 110,000,000 iterations, sampled every 1,000, with a 10,000,000-iteration burn-in. We compared the log marginal likelihoods of the models estimating λ (phylogenetic signal) and those constraining λ to zero using a stepping-stone sampler [8]. This test revealed no statistical difference between the two regression models, thus for the regressions reported here (Table 2B) we constrained λ to zero (λ=0.0001), allowing for consistently null phylogenetic influence.

Table 2B. Body size correlated metric regression statistics.

| Predicted Variable | Predictor Variable | | | | | | | | |
| --- | --- | --- | --- | --- | --- | --- | --- | --- | --- |
| FDW | | | TMTPW | | | TMTIIIW | | |
| R2Avg | R2σ | *p*MCMC | R2Avg | R2σ | *p*MCMC | R2Avg | R2σ | *p*MCMC |
| FL | 0.9753 | <0.0001 | <0.0001 | 0.9809 | 0.0002 | 0.0001 | 0.9762 | 0.0002 | <0.0001 |
| FDW | - | - | - | 0.9587 | 0.0003 | 0.0002 | 0.9895 | 0.0002 | 0.0001 |
| TMTPW | - | - | - | - | - | - | 0.9799 | 0.0002 | <0.0001 |

Reported for each posterior distribution of regressions is average R2 value (R2Avg), standard deviations of R2 values (R2σ), and *p*MCMC for a positive slope.

RETRODICTION ANALYSIS

Retrodiction analysis was completed in BayesTraits V3.0 [7]. Using a continuous regression model, we predicted unknown TMTIIIW values (*Andrewsornis abbotti*, *Andalgalornis steulleti*, and *Physornis fortis*). Three metrics were used as predictors: FL, FDW, and TMTPW. MCMC simulations were run for 110,000,000 iterations, sampling every 1,000, with a 10,000,000-iteration burn-in. The λ parameter was constrained to near zero (λ=0.0001). *L. scagliai* was excluded from the model and was set as an unknown and predicted in the retrodiction. Reported for each prediction is the average predicted TMTIIIW value (TMTIIIWR), plus or minus one standard deviation (Table 2C).

TMTWIIIR values were used for all unknown TMTIIIW values in Phylogenetic Analysis of Covariance (PANCOVA) and Ancestral State Reconstruction (ASR). The average TMTIIIWR value of *Physornis fortis* (4.789 cm) was used in these analyses. The photograph derived TMTIIIW value for *L. scagliai* falls within one standard deviation of all predictions, therefore our photograph TMTIIIW measurement for *L. scagliai* was included in PANCOVA and ASR analyses.

Table 2C. Tarsometatarsus Trochlea III Width retrodictions.

| Genus | Species | TMTIIIW | TMTIIIWR | | |
| --- | --- | --- | --- | --- | --- |
| Predictor Variable | | |
| FL  R2Avg = 0.9672  R2σ= 0.0139 | FDW  R2Avg = 0.9909  R2σ= 0.0046 | TMTPW  R2AVG = 0.9800  R2σ= 0.0054 |
| *Psilopterus* | *affinis* | 0.882 | - | - | - |
| *Psilopterus* | *bachmanni* | 1.008 | - | - | - |
| *Psilopterus* | *lemoinei* | 1.046 | - | - | - |
| *Psilopterus* | *colzecus* | 1.214 | - | - | - |
| *Procariama* | *simplex* | 1.404 | - | - | - |
| *Mesembriornis* | *incertus* | 2.1 | - | - | - |
| *Mesembriornis* | *milneedwardsi* | 2.7 | - | - | - |
| *Llallawavis* | *scagliai* | 1.720* | 1.729 ± 0.291 | 1.720 ± 0.193 | 1.790 ± 0.259 |
| *Andrewsornis* | *abbotti* | - | 1.989 ± 0.234 | - | - |
| *Patagornis* | *marshi* | 1.9 | - | - | - |
| *Andalgalornis* | *steulleti* | - | - | 1.841 ± 0.185 | - |
| *Phorusrhacos* | *longissimus* | 3.367 | - | - | - |
| *Kelenken* | *guillermoi* | 4.196 | - | - | - |
| *Devincenzia* | *pozzi* | 4.55 | - | - | - |
| *Titanis* | *walleri* | 3.6 | - | - | - |
| *Paraphysornis* | *brasiliensis* | 4.3 | - | - | - |
| *Physornis* | *fortis* | - | - | 5.094 ± 0.179 | 4.484 ± 0.216 |

Average R2 value (R2Avg) and standard deviation of R2 values (R2σ) reported for each retrodiction analysis. All TMTIIIW and TMTIIIWR values reported in centimetres.

*TMTIIIW measurement of *L. scagliai*, measured from photographs. Value was excluded from the regression model, set as an unknown, and predicted in the retrodiction.

REFERENCES

1. Campbell KE, Marcus L. 1992 The relationship of hindlimb bone dimensions to body weight in birds. Papers in Avian Paleontology Honoring Pierce Brodkorb 36, 395–412.

2. Degrange FJ. 2012 Morfología del cráneo y complejo apendicular posterior de aves fororracoideas: implicancias en la dieta y modo de vida. Ph.D., Universidad Nacional de La Plata, La Plata, Argentina. See https://repositoriosdigitales.mincyt.gob.ar/vufind/Record/NATURALIS_53bc4bd9553a12c81d6ab90b5b754ae7.

3. Degrange FJ. 2015 Hind limb morphometry of terror birds (Aves, Cariamiformes, Phorusrhacidae): functional implications for substrate preferences and locomotor lifestyle. Earth and Environmental Science Transactions of The Royal Society of Edinburgh 106, 257–276. (doi:10.1017/S1755691016000256)

4. Degrange FJ, Tambussi CP, Taglioretti ML, Dondas A, Scaglia F. 2015 A new Mesembriornithinae (Aves, Phorusrhacidae) provides new insights into the phylogeny and sensory capabilities of terror birds. Journal of Vertebrate Paleontology 35, e912656. (doi:10.1080/02724634.2014.912656)

5. Schneider CA, Rasband WS, Eliceiri KW. 2012 NIH Image to ImageJ: 25 years of image analysis. Nature Methods 9, 671–675. (doi:10.1038/nmeth.2089)

6. Bertelli S, Chiappe LM, Tambussi CP. 2007 A new phorusrhacid (Aves: Cariamae) from the middle Miocene of Patagonia, Argentina. Journal of Vertebrate Paleontology 27, 409–419. (doi:10.1671/0272-4634(2007)27[409:ANPACF]2.0.CO;2)

7. Pagel M, Meade A, Barker D. 2004 Bayesian Estimation of Ancestral Character States on Phylogenies. Systematic Biology 53, 673–684. (doi:10.1080/10635150490522232)

8. Xie W, Lewis PO, Fan Y, Kuo L, Chen M-H. 2011 Improving Marginal Likelihood Estimation for Bayesian Phylogenetic Model Selection. Systematic Biology 60, 150–160. (doi:10.1093/sysbio/syq085)

3. Cursoriality Analysis

PHORUSRHACID CURSORIALITY METRICS

As with our body size metrics, fossil measurements were recovered from the literature (S2 Excel). We used two tests for cursoriality, the Storer method [1], and the method proposed by Angst and coauthors [2]. We thus required measurements for Femur Length (FL), Tibiotarsus Length (TBL), Tarsometatarsus Length (TMTL), and Tarsometatarsus Minimum Width (TMTMW). These values were averaged and used in our calculations (Table 3A).

Table 3A. Averaged cursoriality correlated metrics.

| Genus | Species | FL | TBL | TMTL | TMTMW |
| --- | --- | --- | --- | --- | --- |
| *Psilopterus* | *affinis* | - | - | - | - |
| *Psilopterus* | *bachmanni* | 11.725 | 19.858 | 14.784 | 0.902 |
| *Psilopterus* | *lemoinei* | 14.385 | 23.702 | 17.892 | 1.147 |
| *Psilopterus* | *colzecus* | - | - | - | 1.078 |
| *Procariama* | *simplex* | 15.530 | 28.93 | 21.577 | 1.331 |
| *Mesembriornis* | *incertus* | - | 37 | 30.976 | 1.716 |
| *Mesembriornis* | *milneedwardsi* | 25.865 | 43.776 | 36.816 | 2.357 |
| *Llallawavis* | *scagliai* | 18.469 | 33.253 | 29.434 | 1.477 |
| *Andrewsornis* | *abbotti* | 20.316 | - | - | - |
| *Patagornis* | *marshi* | 21.71 | 37.772 | 27.244 | 1.982 |
| *Andalgalornis* | *steulleti* | - | - | - | - |
| *Phorusrhacos* | *longissimus* | 31 | 51.156 | 38.455 | 3.406 |
| *Kelenken* | *guillermoi* | - | - | 48.52* | 5.7* |
| *Devincenzia* | *pozzi* | - | - | 40.98 | 5.31 |
| *Titanis* | *walleri* | - | - | - | - |
| *Paraphysornis* | *brasiliensis* | 35 | 55 | 30.002 | 5.306 |
| *Physornis* | *fortis* | - | - | - | - |
| *Brontornis* | *burmeisteri* | 42 | 75 | 35.1 | - |

All values reported in centimetres.

*The measurements by Bertelli, Chiappe, and Tambussi [3] (S2 Excel), although closer to the size depicted in the images we inspected [3,4,5], do not include TMTMW. The measurements completed by Degrange [4,5] (S2 Excel) do not match the accompanying pictures but do include both TMTL and TMTMW. Although we are uncertain with regard to the accuracy of the values reported by Degrange [4,5], the proportional relationship between TMTL and TMTMW values should be accurate. Thus, the Degrange [4,5] measurements were used in the cursoriality analysis.

PHORUSRHACID CURSORIALITY ANALYSIS

Utilising the Storer method [1] involves dividing the Tarsometatarsus Length (TMTL) by the length of the entire leg (FL+TBL+TMTL). If that value is greater than 0.3, the animal has cursorial proportions, and if that value is less than 0.3, the animal has graviportal proportions [1] (Table 3B; Figure 3A). Using the method developed by Angst and coauthors’ [2], one divides the Tarsometatarsus Length (TMTL) by the Tarsometatarsus Minimum Width (TMTPW). If that value is greater than 12, the animal has a gracile tarsometatarsus and is thus cursorial [2] (Table 3B; Figure 3A). If the value is less than 12, the animal has a robust tarsometatarsus and is graviportal [2] (Table 3B; Figure 3A).

Table 3B. Cursoriality calculation results.

| Genus | Species | Method | | | |
| --- | --- | --- | --- | --- | --- |
| Storer 1960 [45] | | Angst et al. (2016) [34] | |
| Coefficient | Interpretation | Coefficient | Interpretation |
| *Psilopterus* | *affinis* | - | - | - | - |
| *Psilopterus* | *bachmanni* | 0.319 | C | 16.4 | C |
| *Psilopterus* | *lemoinei* | 0.320 | C | 15.6 | C |
| *Psilopterus* | *colzecus* | - | - | - | - |
| *Procariama* | *simplex* | 0.327 | C | 16.2 | C |
| *Mesembriornis* | *incertus* | - | - | 18.1 | C |
| *Mesembriornis* | *milneedwardsi* | 0.346 | C | 15.6 | C |
| *Llallawavis* | *scagliai* | 0.363 | C | 19.9 | C |
| *Andrewsornis* | *abbotti* | - | - | - | - |
| *Patagornis* | *marshi* | 0.314 | C | 13.7 | C |
| *Andalgalornis* | *steulleti* | - | - | - | - |
| *Phorusrhacos* | *longissimus* | 0.319* | C | 11.3* | G |
| *Kelenken* | *guillermoi* | - | - | 8.51 | G |
| *Devincenzia* | *pozzi* | - | - | 7.72 | G |
| *Titanis* | *walleri* | - | - | - | - |
| *Paraphysornis* | *brasiliensis* | 0.250 | G | 5.65 | G |
| *Physornis* | *fortis* | - | - | - | - |
| *Brontornis* | *burmeisteri* | 0.231 | G | - | - |

Interpretations: C - Cursorial; G - Graviportal

*Note that *P. longissimus* has cursorial limb proportions but a robust tarsometatarsus. Given this mismatch of interpretations, and the fact that the coefficient for the robusticity of the tarsometatarsus is extremely close to the boundary between graviportality and cursoriality, we interpret *P. longissimu*s to have been cursorial.


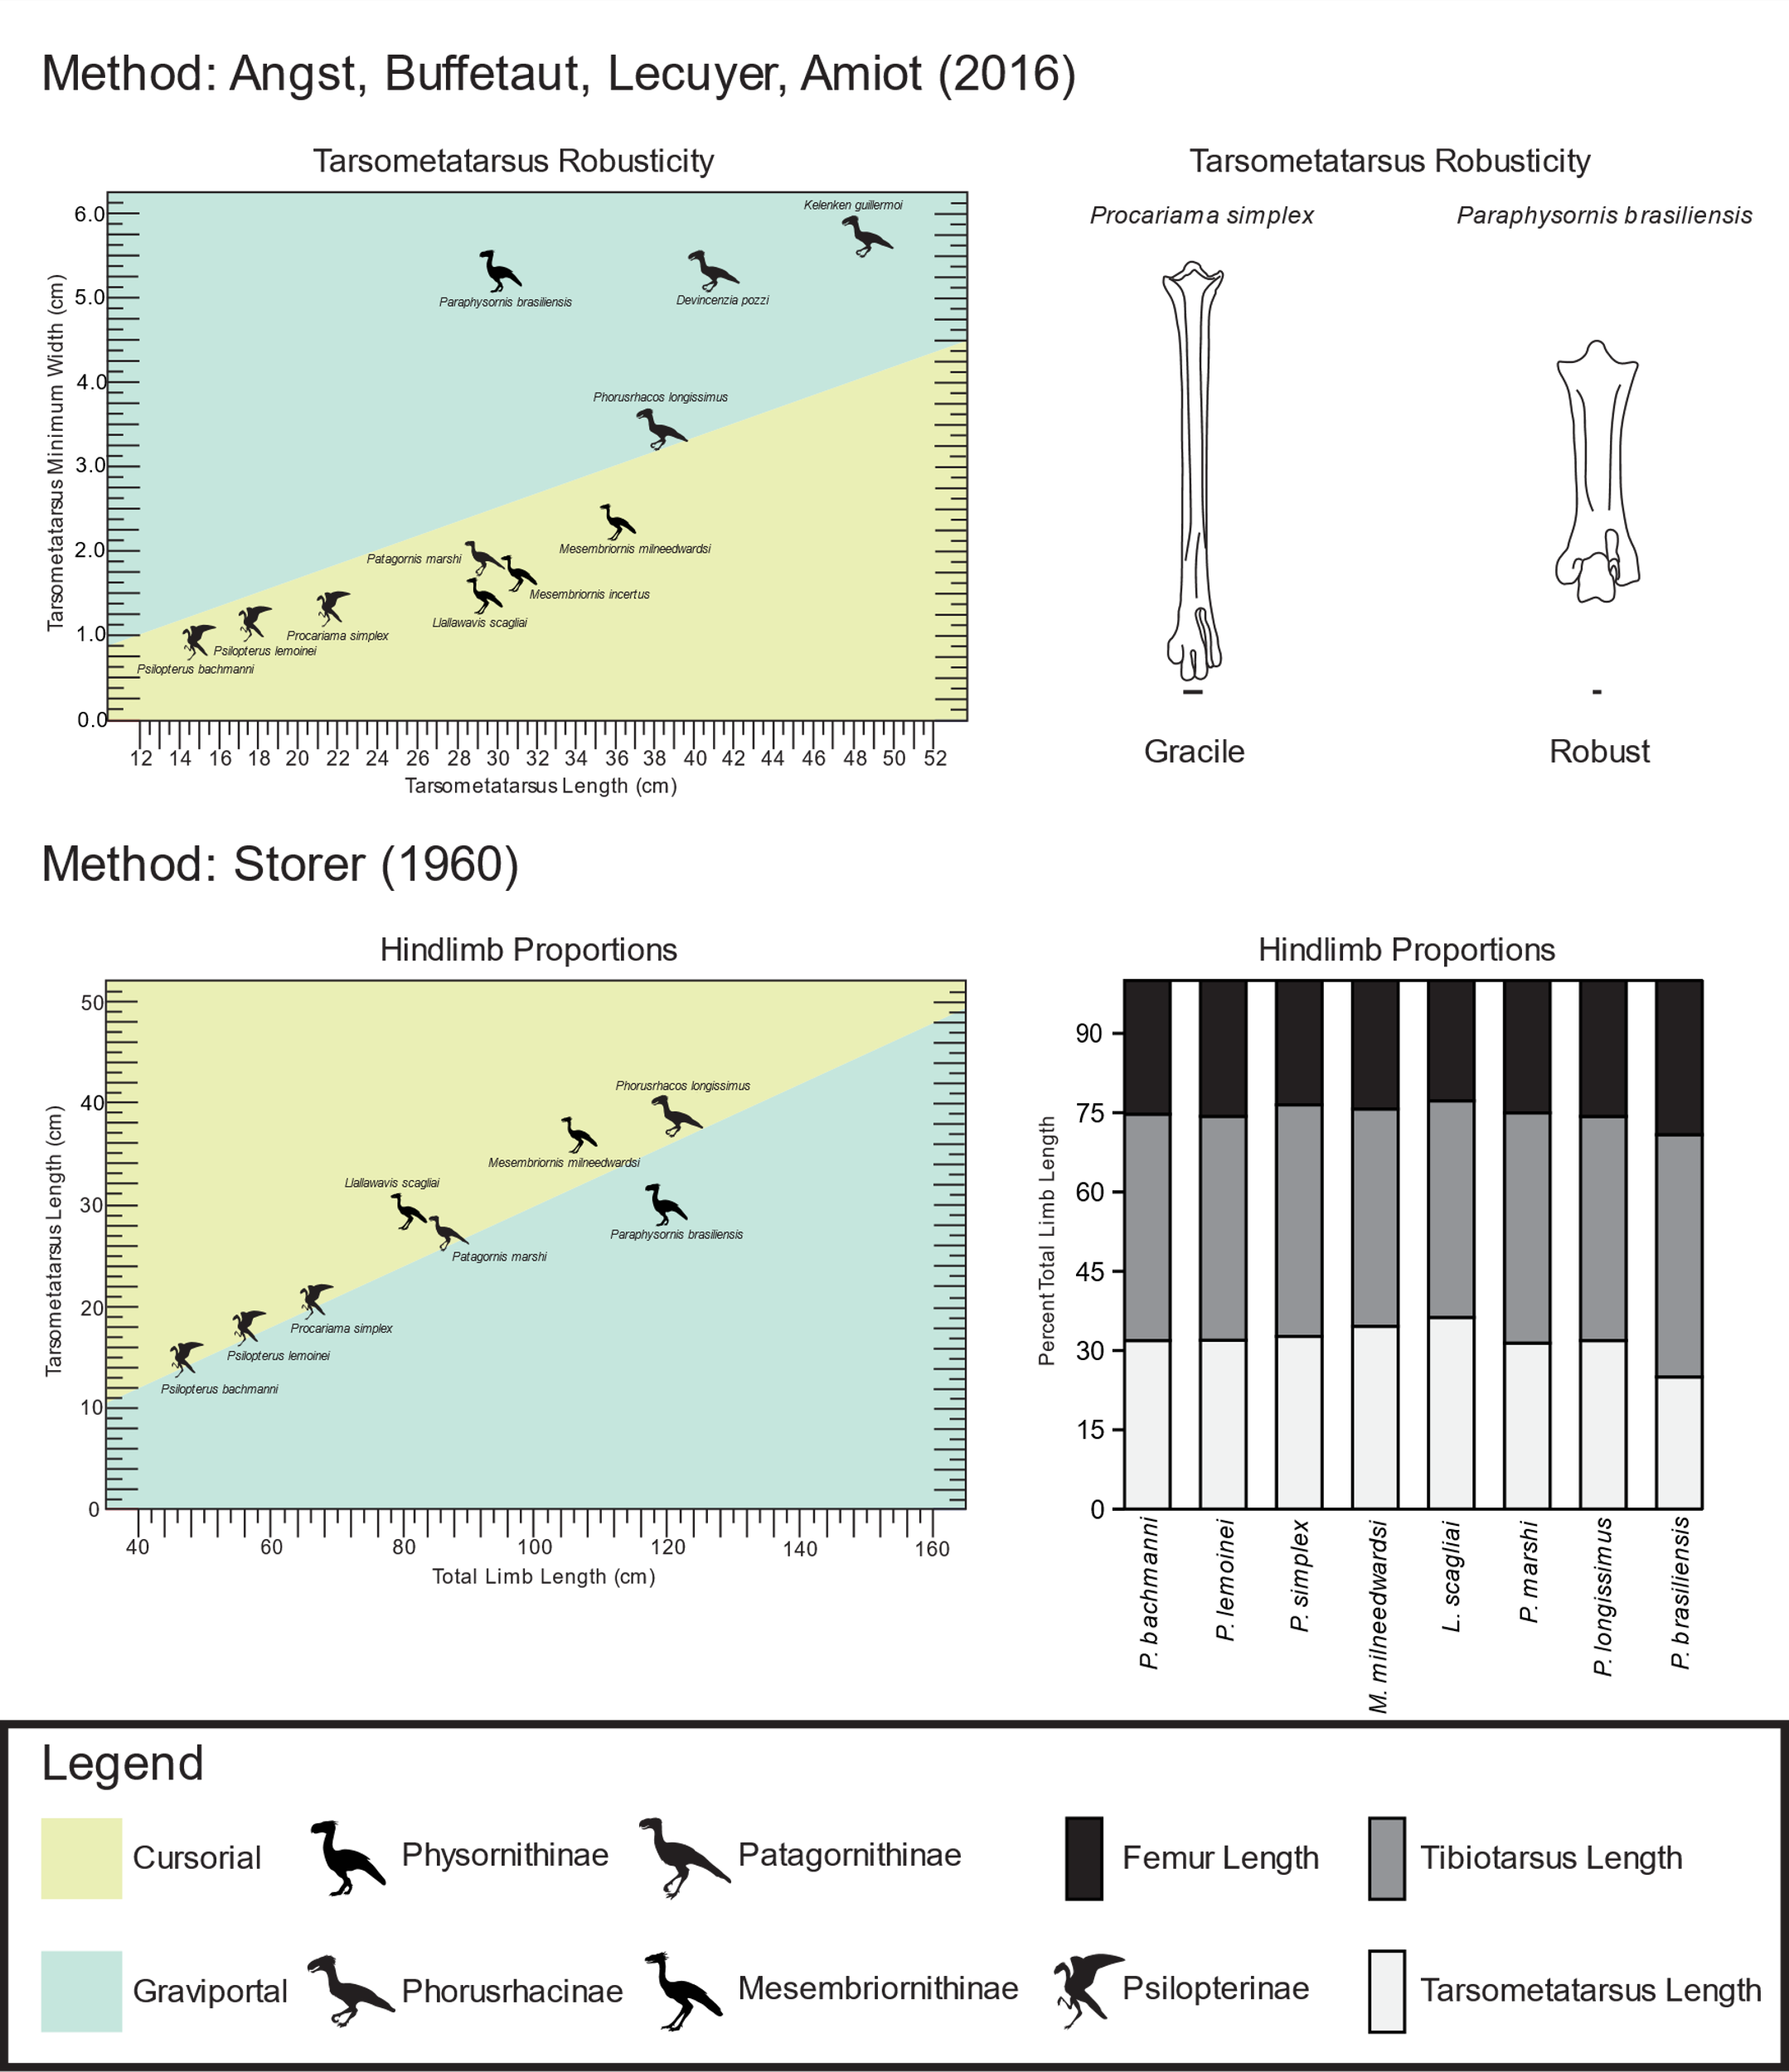


Figure 3A. Locomotor morphology of phorusrhacids. Tarsometatarsus illustrations based on images from Alvarenga and Höfling [6]. Hindlimb proportions visualised in PAST 4.12 [7]. Bar equals one centimetre. Silhouettes (*Psilopterus lemoinei*, *Mesembriornis milneedwardsi*, *Patagornis marshi*, *Phorusrhacos longissimus*, and *Paraphysornis brasiliensis* by Thomas W. LaBarge: CC BY 4.0) sourced from PhyloPic (phylopic.org).

REFERENCES

1. Storer RW. 1960 Adaptive Radiation in Birds. In Biology and Comparative Physiology of Birds (ed AJ Marshall), pp. 15–55. Academic Press. (doi:10.1016/B978-1-4832-3142-6.50007-0)

2. Angst D, Buffetaut E, Lecuyer C, Amiot R. 2016 A new method for estimating locomotion type in large ground birds. Palaeontology 59, 217–223. (doi:10.1111/pala.12224)

3. Bertelli S, Chiappe LM, Tambussi CP. 2007 A new phorusrhacid (Aves: Cariamae) from the middle Miocene of Patagonia, Argentina. Journal of Vertebrate Paleontology 27, 409–419. (doi:10.1671/0272-4634(2007)27[409:ANPACF]2.0.CO;2)

4. Degrange FJ. 2012 Morfología del cráneo y complejo apendicular posterior de aves fororracoideas: implicancias en la dieta y modo de vida. Ph.D., Universidad Nacional de La Plata, La Plata, Argentina. See https://repositoriosdigitales.mincyt.gob.ar/vufind/Record/NATURALIS_53bc4bd9553a12c81d6ab90b5b754ae7.

5. Degrange FJ. 2015 Hind limb morphometry of terror birds (Aves, Cariamiformes, Phorusrhacidae): functional implications for substrate preferences and locomotor lifestyle. Earth and Environmental Science Transactions of The Royal Society of Edinburgh 106, 257–276. (doi:10.1017/S1755691016000256)

6. Alvarenga HMF, Höfling E. 2003 Systematic revision of the Phorusrhacidae (Aves: Ralliformes). Papéis Avulsos de Zoologia 43, 55–91. (doi:10.1590/S0031-10492003000400001)

7. Hammer Ø, Harper DAT, Ryan PD. 2001 PAST: Paleontological statistics software package for education and data analysis. Palaeontologia Electronica 4, 1–9.

4. Phorusrhacid Systematics

PHYLOGENETIC SYSTEMATICS OF PHORUSHACIDAE

We reappraise the systematics of Phorusrhacidae using our phylogeny. We first evaluate the statistical support for each of the five purported subfamilies. We then classify each species into their respective subfamily (Table 4A). The systematics used here follow the taxonomy proposed by Alvarenga, Chiappe, and Bertelli [1] (which expanded upon the systematic revision by Alvarenga and Höfling [2]) with the exception of our exclusion of *Paleopsilopterus itaboraiensis* and *Brontornis burmeisteri*. In excluding *Brontornis burmeisteri*, *Physornis fortis* and *Paraphysornis brasiliensis* are conferred to the subfamilyPhysornithinae (sensu Agnolín [3]).

Psilopterinae is not well supported by our posterior distribution of trees (PP = 0.62), but we nonetheless continue to reference this subfamily given their ecological significance, the morphological similarity of psilopterines outside our phylogenetic characters, and their overall morphological distinctiveness compared to other phorusrhacids [2,4,5,6,7,8,9,10,11]. The monophyly of this clade is supported across all previous phylogenetic studies [1,12,13,14], but Psilopterinae only possesses two synapomorphies in our dataset: laterally compressed distal condyles of the tibiotarsus (character 108) and anteroposterior expansion of the medial distal condyle of the tibiotarsus (character 109). *Procariama simplex* is recovered within Psilopterinae, counter to the recent interpretations presented by Degrange and colleagues [14], but congruent to the traditionally hypothesised relationships [2]. We recover *P. lemoinei* more closely related to *P. simplex* than *P. bachmanni*, albeit with low node support (PP = 0.61). Given the lower clade credibility found within the nodes of Psilopterinae, and our omission of *Psilopterus affinis* and *Psilopterus colzecus*, these relationships may change with additional study.

The monophyly of Mesembriornithinae is moderately supported (PP = 0.74). This clade is currently linked by a single synapomorphy: an extremely elongated tarsometatarsus (character 112). However, characters 49, 56, 75, 79, and 118 could possibly be synapomorphies; at this time, we lack the character states of various mesembriornithine species necessary to make that assessment. *M. incertus* and *M. milneedwardsi* are strongly inferred as sister taxa (PP = 0.99). *L. scagliai* is the latest surviving mesembriornithine but represents the basal-most member of this subfamily. This is curious given the otherwise fast and uniform succession of these three species from *Mesembriornis incertus* to *Mesembriornis milneedwardsi* to *L. scagliai*. This position could represent either an extended ghost lineage separating the ancestors of *L. scagliai* from other mesembriornithines, as inferred here, or extremely rapid evolution from the *Mesembriornis* lineage following the Montehermosan SALMA. However, many characters in *L. scagliai* are shared with Psilopterinae and are lost in *Mesembriornis*. This could indicate either a possible affinity with Psilopterinae rather than Mesembriornithinae, a plesiomorphic expression in *L. scagliai* (as would be expected for a basal taxon), or a convergence between these two lineages. As noted by Degrange [15, e1848855-15], *L. scagliai* does possess a “Psilopterine Skull”. However, the lack of viable cranial material from *Mesembriornis* prevents us from assessing the importance of this disparity and whether the skull of *L. scagliai* exhibits a significant morphologic departure from the remainder of Mesembriornithinae [15].

Patterson and Kraglievich [16] hypothesised that Psilopterinae and Mesembriornithinae form a linage separate from the remainder of Phorusrhacidae. This was later supported by the phylogenetic analysis by Agnolín [12] (though notably refuted by subsequent work [13]) and by Degrange and colleagues [14]. Degrange [7,15] likewise suggested this division, based on the morphology of the skull and pelvis, designating Mesembriornithinae and Psilopterinae as the “Psilopterine” morphotype and Patagornithinae and Phorusrhacinae as the “Terror Bird” morphotype (Physornithinae was excluded from this assessment due to their poor fossil record). We observe this separation in our phylogeny. The “Terror Bird” (sensu Degrange [7,15]) lineage is well supported as a distinct clade in our tree (PP ≈ 1), while the “Psilopterine” lineage is observed, but poorly supported (PP = 0.64). This division is supported by characters 28, 29, 31, 32, 33, 42, 58, 61, 62, 63, 66, 85, 86, 133, and 134. However, the majority of these characters have poor (<75%) taxonomic coverage.

We observe a monophyletic Patagornithinae (PP = 0.86). In the phylogenies by Alvarenga, Chiappe, and Bertelli [1] and Degrange and colleagues [14], Patagornithinae was paraphyletic and polytomous with members of Phorusrhacinae and Physornithinae/Brontornithinae. Agnolín’s [12,13] phylogenies likewise produced a paraphyletic Patagornithinae, basal to the phorusrhacines and physornithines, with *Andalgalornis steulleti* in a polytomy with *Phorusrhacos longissimus*. Our results demonstrate this subfamily as a unique clade, basal to both Phorusrhacinae and Physornithinae. This subfamily includes *Andrewsornis abbotti*, *P. marshi*, and *A. steulleti*, as is typically hypothesised [2]. *P.* *marshi* is strongly found to be sister to *A. steulleti* (PP = 0.87), with *A. abbotti* basal to both. Importantly, this pattern matches the biostratigraphic progression of these species. The members of this clade all demonstrate strong ventral projection of the upper beak, in the region between the tomial notch and the maxillary fenestra (character 6). Characters 24 and 26 could also be synapomorphies, though we lack the requisite cranial and pelvic material from *A. abbotti*. Characters 21, 25, and 27 differentiate Patagornithinae from Phorusrhacinae, and are instead shared with Psilopterinae and Mesembriornithinae. However, such characters are not recorded for Physornithinae. Likewise, characters 19, 22, 23, and 52 differentiate Phorusrhacinae from *P. marshi*, and *A. steulleti*, but are unknown in *A. abbotti* and Physornithinae. Overall, it appears that a unique combination of plesiomorphic characters and shared derived characters with Phorusrhacinae and Physornithinae, along with a few key apomorphies, result in the monophyletic placement of Patagornithinae.

Only 26% of sampled trees (PP = 0.26) produced a monophyletic Phorusrhacinae containing all hypothesised species (*P. longissimus,* *K. guillermoi*, *D. pozzi*, and *Titanis walleri*). *P. longissimus* and *T. walleri* form a separate clade, but with low support (PP = 0.65). *K. guillermoi* and *D. pozzi* are strongly inferred as sister taxa (PP = 0.92), but remain outside this lineage, poorly affiliated with Physornithinae (PP = 0.50). If *Brontornis* is included, the posterior probability of this node decreases (PP = 0.43). The phylogenetic analysis presented by Alvarenga, Chiappe, and Bertelli [1] returned a polytomy of Patagornithinae, Phorusrhacinae, and Brontornithinae (Physornithinae and *Brontornis burmeisteri*), wherein the only distinct grouping was between *K. guillermoi* and *D. pozzi*. Agnolín [12,13] observed *K. guillermoi and D. pozzi* in a monophyletic clade with both *P. brasiliensis* and *P. fortis*, but paraphyletic to each other. Degrange and colleagues [14] observed *K. guillermoi* and *D. pozzi* as paraphyletic to each other, basal to *T. walleri* and a polytomy of Physornithinae, Patagornithinae, and *P. longissimus*.

We argue that the poor preservation of Phorusrhacinae and Physornithinae are responsible for the lack of characters which would otherwise support the monophyly of Phorusrhacinae and the separation of *K. guillermoi* and *D. pozzi* from Physornithinae. There are few characters in our matrix which are documented across physornithines and phorusrhacines, and there is a paucity of characters currently measurable from these taxa in general (less than 50% documentation except for *P. longissimus* and *P. brasiliensis*). We observe several synapomorphies between the taxa attributed to Phorusrhacinae, but none are documented across all purported phorusrhacines. In *D. pozzi* and *P. longissimus*, the postorbital process of the lacrimal is detached caudally from the orbit (character 38). In *K. guillermoi* and *P. longissimus*, the nares is long and narrow (character 19), positioned far anterior to the antorbital fossa (character 27), and oriented near parallel to the frontal plane (character 23). In *K. guillermoi*, *T. walleri*, and *P. longissimus*, the nasal sinus tapers anteriorly (character 25) and the ventral margin is straight and horizontal (character 21). These synapomorphies are all cranial characters, none of which are preserved in the fossil record of Physornithinae. More skeletal material from both Phorusrhacinae and Physornithinae will be needed to determine the significance of these synapomorphies.

Although its nearest relatives are poorly constrained, *P. longissimus* is phylogenetically separated from all other phorusrhacid subfamilies, thus supporting the existence of Phorusrhacinae. We infer *T. walleri* to be monophyletic with *P. longissimus* and attribute the low posterior probability of this node to poor character preservation. We refer to this clade as Gracile Phorusrhacinae in order to make comparisons with *K. guillermoi* and *D. pozzi*. We regard *K. guillermoi* and *D. pozzi* as likely members of Phorusrhacinae (Table 4A) but separate this lineage in our comparative analysis, following our phylogenetic results. We label these taxa as Robust Phorusrhacinae, differentiating them from *P. longissimus* and *T. walleri* for the purpose of making phylogenetically controlled observations.

Physornithinae is strongly supported as a clade within our phylogeny (PP ≈ 1). This clade remains well supported even when *Brontornis* is included within the phylogeny (PP ≈ 1). Agnolín [12,13] recovered a monophyletic group composed of *P. fortis* and *P. brasiliensis*, therein referred to as Physornithini. In the analyses by Alvarenga, Chiappe, and Bertelli [1] and Degrange and colleagues [14], these species were polytomous with Phorusrhacinae and Patagornithinae (although in the latter study, *K. guillermoi*, *D. pozzi*, and *T. walleri* were found basal to the crown group polytomy). Physornithinae is supported by the following synapomorphies: caudal expansion of the quadratojugal (character 32), anteroposterior compression of the tarsometatarsus (character 113), and a subrectangular lateral cotyle of the tarsometatarsus (character 114). Characters states for characters 64, 99, 112, and 119 are also unique to *P. brasiliensis* (among Phorusrhacidae) but are unknown for *P. fortis*.

We cannot make any conclusions about the interrelationships of Bathornithidae, Ameghinornithidae, or Idiornithidae, nor their relation to Phorusrhacidae. Their inclusion serves to constrain the distinctive morphology of Phorusrhacidae, but their genus-level description prevents an accurate assessment of their evolutionary history.

Table 4A. Systematics of Phorusrhacidae.

| Family | Subfamily | Genus | Species |
| --- | --- | --- | --- |
| Phorusrhacidae [17] | Psilopterinae [18] | *Psilopterus* [19] | *Psilopterus affinis* [17] |
| *Psilopterus bachmanni* [19] |
| *Psilopterus lemoinei* [19] |
| *Psilopterus* colzecus [9] |
| *Procariama* [20] | *Procariama simplex* [20] |
| Mesembriornithinae [21] | *Mesembriornis* [22] | *Mesembriornis milneedwardsi* [22] |
| *Mesembriornis incertus* [20] |
| *Llallawavis* [14] | *Llallawavis scagliai* [14] |
| Patagornithinae [23] | *Andrewsornis* [24] | *Andrewsornis abbotti* [24] |
| *Patagornis* [19] | *Patagornis marshi* [19] |
| *Andalgalornis* [16] | *Andalgalornis steulleti* [25] |
| Phorusrhacinae [26] | *Phorusrhacos* [26] | *Phorusrhacos longissimus* [17] |
| *Kelenken* [27] | *Kelenken guillermoi* [27] |
| *Devincenzia* [21] | *Devincenzia pozzi* [25] |
| *Titanis* [28] | *Titanis walleri* [28] |
| Physornithinae* [3] | *Physornis* [29] | *Physornis fortis* [29] |
| *Paraphysornis* [30] | *Paraphysornis brasiliensis* [31] |
| Incertae sedis | Incertae sedis | *Paleopsilopterus* [32] | *Paleopsilopterus itaboraiensis* [32] |
| *Eleutherornis* [33] | *Eleutherornis cotei* [34] |
| *Lavocatavis* [35] | *Lavocatavis africana* [35] |
| *Patagorhacos* [36] | *Patagorhacos terrificus* [36] |
| *Brontornis* [19] | *Brontornis burmeisteri* [19] |

*Equivalent to Brontornithinae [19] if *Brontornis* is included within Phorusrhacidae.

REFERENCES

1. Alvarenga HMF, Chiappe L, Bertelli S. 2011 Phorusrhacids: the Terror Birds. In Living Dinosaurs, pp. 187–208. John Wiley & Sons, Ltd. (doi:10.1002/9781119990475.ch7)

2. Alvarenga HMF, Höfling E. 2003 Systematic revision of the Phorusrhacidae (Aves: Ralliformes). Papéis Avulsos de Zoologia 43, 55–91. (doi:10.1590/S0031-10492003000400001)

3. Agnolín FL. 2007 *Brontornis burmeisteri* Moreno & Mercerat, un Anseriformes (Aves) gigante del Mioceno Medio de Patagonia, Argentina. Revista Museo Argentino Ciencias Naturales 9, 15–25.

4. Degrange FJ. 2015 Hind limb morphometry of terror birds (Aves, Cariamiformes, Phorusrhacidae): functional implications for substrate preferences and locomotor lifestyle. Earth and Environmental Science Transactions of The Royal Society of Edinburgh 106, 257–276. (doi:10.1017/S1755691016000256)

5. Degrange FJ, Noriega J, Vizcaíno S. 2015 Morphology of the forelimb of *Psilopterus bachmanni* (Aves, Cariamiformes) (Early Miocene of Patagonia). Paläontologische Zeitschrift 89, 1087–1096. (doi:10.1007/s12542-015-0269-1)

6. Degrange FJ, Tambussi CP. 2011 Re-examination of *Psilopterus lemoinei* (Aves, Phorusrhacidae), a late early Miocene little terror bird from Patagonia (Argentina). Journal of Vertebrate Paleontology 31, 1080–1092. (doi:10.1080/02724634.2011.595466)

7. Degrange FJ. 2012 Morfología del cráneo y complejo apendicular posterior de aves fororracoideas: implicancias en la dieta y modo de vida. Ph.D., Universidad Nacional de La Plata, La Plata, Argentina. See https://repositoriosdigitales.mincyt.gob.ar/vufind/Record/NATURALIS_53bc4bd9553a12c81d6ab90b5b754ae7.

8. Degrange FJ, Noriega JI, Areta JI. 2012 Diversity and paleobiology of the Santacrucian birds. In Early Miocene Paleobiology in Patagonia: High-Latitude Paleocommunities of the Santa Cruz Formation (eds SF Vizcaíno, RF Kay, MS Bargo), pp. 138–155. Cambridge: Cambridge University Press. (doi:10.1017/CBO9780511667381.010)

9. Tonni E, Tambussi CP. 1988 Un nuevo Psilopterinae (Aves: Ralliformes) del Mioceno tardio de la Provincia de Buenos Aires, Republica Argentina. Ameghiniana 25, 155–160.

10. Alvarenga HMF, Jones W, Rinderknecht A. 2010 The youngest record of phorusrhacid birds (Aves, Phorusrhacidae) from the late Pleistocene of Uruguay. Neues Jahrbuch für Geologie und Paläontologie - Abhandlungen 256, 229–234. (doi:10.1127/0077-7749/2010/0052)

11. Jones W, Rinderknecht A, Alvarenga HMF, Montenegro F, Ubilla M. 2018 The last terror birds (Aves, Phorusrhacidae): new evidence from the late Pleistocene of Uruguay. Paläontologische Zeitschrift 92, 365–372. (doi:10.1007/s12542-017-0388-y)

12. Agnolín FL. 2009 Sistemática y Filogenia de las Aves Fororracoideas (Gruiformes, Cariamae). Monografías Fundación Azara , 79.

13. Agnolín FL. 2013 La posición sistemática de *Hermosiornis* (Aves, Phororhacoidea) y sus implicancias filogenéticos. Revista del Museo Argentino de Ciencias Naturales 15, 39–60.

14. Degrange FJ, Tambussi CP, Taglioretti ML, Dondas A, Scaglia F. 2015 A new Mesembriornithinae (Aves, Phorusrhacidae) provides new insights into the phylogeny and sensory capabilities of terror birds. Journal of Vertebrate Paleontology 35, e912656. (doi:10.1080/02724634.2014.912656)

15. Degrange FJ. 2021 A Revision of Skull Morphology In Phorusrhacidae (Aves, Cariamiformes). Journal of Vertebrate Paleontology 40, e1848855. (doi:10.1080/02724634.2020.1848855)

16. Patterson B, Kraglievich L. 1960 Sistemática y nomenclatura de las aves fororracoideas del Plioceno Argentino. Publicacion del Museo Municipal Ciencias Naturales y Tradicionales de Mar del Plata 1, 1–51.

17. Ameghino F. 1899 Sinopsis geológico-paleontológica, Suplemento (Adiciones y correciones). La Plata, 13.

18. Dolgopol de Saez M. 1927 Las aves corredoras fósiles del Santacrucense. Anales de la Sociedad Cientifica Argentina 103, 145–164.

19. Moreno FP, Mercerat A. 1891 Catálogo de los pájaros fósiles de la República Argentina conservados en el Museo de La Plata. Anales del Museo de La Plata 1, 7–71.

20. Rovereto C. 1914 Los estratos araucanos y sus fósiles. Anales del Museo Nacional Historia Natural de Buenos Aires 25, 1–247.

21. Kraglievich L. 1932 Una gigantesca ave fósil del Uruguay, Devincenzia gallinali n. gen. n. sp., tipo de una nueva familia, Devincenziidae, del Orden Stereornithes. Anales del Museo Historia Natural de Montevideo 3, 323–355.

22. Moreno FP. 1889 Breve reseña de los progresos del Museo La Plata, durante el segundo semestre de 1888. Boletin del Museo La Plata 3, 1–44.

23. Mercerat A. 1897 Note sur les oiseaux fossiles de la Republique Argentine. Anales de la Sociedad Cientifica Argentina 43, 222–240.

24. Patterson B. 1941 A new phororhacoid bird from the Deseado formation of Patagonia. Field Museum of Natural History, Geological Series 8, 49–54.

25. Kraglievich L. 1931 Contribución al conocimiento de las aves fósiles de la época araucoentrerriana. Physis 10, 304–315.

26. Ameghino F. 1889 Contribuición al conocimiento de los mamíferos fósiles de la República Argentina. Actas Academia Nacional Ciencias de Cordoba 6, 1–1028.

27. Bertelli S, Chiappe LM, Tambussi CP. 2007 A new phorusrhacid (Aves: Cariamae) from the middle Miocene of Patagonia, Argentina. Journal of Vertebrate Paleontology 27, 409–419. (doi:10.1671/0272-4634(2007)27[409:ANPACF]2.0.CO;2)

28. Brodkorb P. 1963 A giant flightless bird from the Pleistocene of Florida. The Auk 80, 111–115.

29. Ameghino F. 1895 Sobre las aves fósiles de Patagonia. Boletín del Instituto Geográfico de Argentina 15, 501–602.

30. Alvarenga HMF. 1993 Paraphysornis novo gênero para Physornis brasiliensis Alvarenga, 1982 (Aves: Phorusrhacidae). Anais da Academia Brasileira de Ciências 65, 403–406.

31. Alvarenga HMF. 1982 Uma gigantesca ave fóssil do Cenozóico brasileiro: Physornis brasiliensis sp. n. Anais da Academia Brasileira de Ciências 54, 697–712.

32. Alvarenga HMF. 1985 Um novo Psilopteridae (Aves: Gruiformes) dos sedimentos Terciários de Itaboraí, Rio de Janeiro, Brasil. In Anais, pp. 17–20. Rio de Janeiro.

33. Schaub S. 1940 Ein Ratitenbecken aus dem Bohnerz von Egerkingen. Eclogae Geologicae Helvetiae 33, 274–284.

34. Gaillard C. 1936 Un oiseau géant dans les dépôts éocènes du Mont-d’Or lyonnais. Comptes rendus hebdomadaires des séances de l’Académie des sciences 202, 965–967.

35. Mourer-Chauviré C, Tabuce R, Mahboubi M, Adaci M, Bensalah M. 2011 A Phororhacoid bird from the Eocene of Africa. Naturwissenschaften 98, 815–823. (doi:10.1007/s00114-011-0829-5)

36. Agnolin FL, Chafrat P. 2015 New fossil bird remains from the Chichinales Formation (Early Miocene) of northern Patagonia, Argentina. Annales de Paléontologie 101, 87–94. (doi:10.1016/j.annpal.2015.02.001)

5. PANCOVA

PHYLOGENETIC ANALYSIS OF COVARIANCE

A Phylogenetic Analysis of Covariance (PANCOVA) was completed using a phylogenetic generalised least squares regression model of body size (TMTIIIW) against time (Ma). At 1.8 Ma and 23.03 Ma, we modelled the differences in slopes and intercepts among three clades: Mesembriornithinae + Psilopterinae, Patagornithinae, and Physornithinae + Phorusrhacinae. With three clades, we used two binary (‘dummy-coded’) indicator variables to designate whether a species is a member of the clades Patagornithinae (0 or 1) or Physornithinae + Phorusrhacinae (0 or 1). For example, the species *Physornis fortis* was coded as 0 1 to indicate its membership in the clade Physornithinae + Phorusrhacinae. Mesembriornithinae + Psilopterinae was our baseline group of comparison, in which species were coded as 0 0. Our PANCOVA also included interactions between each indicator variable and body size, allowing the slopes of body size change through time to vary among clades. We evaluate the significance of the regression coefficients by calculating a *p*MCMC for the slopes and intercepts. We determined whether the intercepts for Physornithinae + Phorusrhacinae and Patagornithinae were significantly different from the baseline (Mesembriornithinae + Psilopterinae) by calculating a *p*MCMC. We then observed the differences in the regression coefficients within each clade, comparing slopes and intercepts at 1.8 Ma to those at 23.03 Ma (Table 5A). We summarised the posterior distributions of PANCOVA regression coefficients as 95% Highest Posterior Density Intervals (HPDI) (Table 5B). We then calculated the overlap between the intercepts of each clade, comparing at both 1.8 Ma and 23.03 Ma (Table 5C). Overlap was calculated by determining the number (n) of estimates within the range of both the 95% HPDI of the observed distribution (A95) and the 95% HPDI of the compared distribution (B95). This value was then divided by 95,000 (95% of a 100,000-estimate posterior distribution) to compare overlap (Table 5C).

Table 5A. Average PANCOVA regression coefficients at 1.8 Ma and 23.03 Ma

| Age | Regression | | | | | |
| --- | --- | --- | --- | --- | --- | --- |
| Ph + P | | Pa | | M + Ps | |
| Intercept | Slope | Intercept | Slope | Intercept | Slope |
| 1.8 Ma | 3.841 | +0.024 | 1.785 | +0.010 | 2.269 | -0.086 |
| *pMCMC* < 0.001  *p*MCMC(α) = 0.023 | *p*MCMC = 0.196 | *pMCMC* = 0.019  *p*MCMC(α) = 0.081 | *p*MCMC = 0.422 | *p*MCMC < 0.001 | *p*MCMC = 0.027 |
| 23.03 Ma | 4.363 | +0.025 | 1.994 | +0.010 | 0.441 | -0.086 |
| *pMCMC*< 0.001  *p*MCMC(α) =0.018 | *p*MCMC = 0.188 | *pMCMC*= 0.001  *p*MCMC(α) = 0.071 | *p*MCMC = 0.418 | *p*MCMC = 0.215 | *p*MCMC = 0.022 |

Abbreviations: Ph + P, Physornithinae + Phorusrhacinae; Pa, Patagornithinae; M + Ps, Mesembriornithinae + Psilopterinae. *p*MCMC, in reference to a directional (non-zero) slope and non-zero intercept, reported for each regression. *p*MCMC(α), in reference to a significantly different intercept from the baseline (M + Ps), reported for the intercepts of Ph + P and Pa.

Table 5B. 95% HPDI of PANCOVA regression coefficients

| 1.8 Ma | | | | | | |
| --- | --- | --- | --- | --- | --- | --- |
|  | Regression | | | | | |
| Ph + P | | Pa | | M + Ps | |
| Intercept | Slope | Intercept | Slope | Intercept | Slope |
| Max | 4.796 | +0.087 | 3.472 | +0.124 | 3.107 | +0.005 |
| Min | 2.909 | -0.037 | 0.146 | -0.100 | 1.428 | -0.170 |

| 23.03 Ma | | | | | | |
| --- | --- | --- | --- | --- | --- | --- |
|  | Regression | | | | | |
| Ph + P | | Pa | | M + Ps | |
| Intercept | Slope | Intercept | Slope | Intercept | Slope |
| Max | 4.992 | +0.084 | 2.985 | +0.115 | 1.663 | -0.002 |
| Min | 3.730 | -0.035 | 0.988 | -0.098 | -0.752 | -0.168 |

Abbreviations: Ph + P, Physornithinae + Phorusrhacinae; Pa, Patagornithinae; M + Ps, Mesembriornithinae + Psilopterinae.

Table 5C. Overlap of PANCOVA intercepts at 95% HPDI.

| 1.8 Ma | | | |
| --- | --- | --- | --- |
| Intercept | Comparison | | |
| Ph + P | Pa | M + Ps |
| Ph + P | 1 | 0.181 | 0.031 |
| Pa | 0.058 | 1 | 0.664 |
| M + Ps | 0.035 | 1 | 1 |

| 23.03 Ma | | | |
| --- | --- | --- | --- |
| Intercept | Comparison | | |
| Ph + P | Pa | M + Ps |
| Ph + P | 1 | 0 | 0 |
| Pa | 0 | 1 | 0.222 |
| M + Ps | 0 | 0.150 | 1 |

Abbreviations: Ph + P, Physornithinae + Phorusrhacinae; Pa, Patagornithinae; M + Ps, Mesembriornithinae + Psilopterinae.

6. Ancestral State Reconstruction

ANCESTRAL STATE RECONSTRUCTION OF BODY SIZE

We estimated a posterior distribution of Tarsometatarsus Trochlea III Width (TMTIIIW) values for the most recent common ancestor (MRCA) of each subfamily to estimate the size overlap between each subfamily, as a measure of the potential for competition. We divided Phorusrhacinae into Robust Phorusrhacinae (*Kelenken guillermoi* and *Devincenzia pozzi*) and Gracile Phorusrhacinae (*Phorusrhacos longissimus* and *Titanis walleri*), following our phylogenetic results. We summarised the posterior distribution of each MRCA as a 95% Highest Posterior Density Interval (HPDI) (Table 6A). Similar to our previous analysis of PANCOVA regression coefficients (S5 Text), we calculated the overlap of MRCAs by determining proportion of TMTIIIW estimates within both the 95% HPDI of the MRCA being evaluated, and the 95% HPDI of each other MRCA (Table 6B). These proportions were calculated in relation to each subfamily (i.e., Patagornithinae into Mesembriornithinae and Mesembriornithinae into Patagornithinae).

Table 6A. 95% highest posterior density intervals of ancestral state reconstructions of TMTIIIW.

| MRCA | HPDI (95%) | |
| --- | --- | --- |
| Min  (cm) | Max  (cm) |
| Physornithinae | 3.577 | 4.918 |
| Robust Phorusrhacinae | 3.283 | 4.919 |
| Gracile Phorusrhacinae | 2.607 | 4.330 |
| Patagornithinae | 1.443 | 3.155 |
| Mesembriornithinae | 1.183 | 3.074 |
| Psilopterinae | 0.647 | 2.559 |

Table 6B. Matrix of overlap between ancestral state reconstructions at 95% HPDI.

| Subfamily | Comparison | | | | | |
| --- | --- | --- | --- | --- | --- | --- |
| Ph | RP | GP | Pa | M | Ps |
| Ph | 1 | 1 | 0.544 | 0 | 0 | 0 |
| RP | 0.933 | 1 | 0.711 | 0 | 0 | 0 |
| GP | 0.383 | 0.683 | 1 | 0.210 | 0.155 | 0 |
| Pa | 0 | 0 | 0.198 | 1 | 0.988 | 0.769 |
| M | 0 | 0 | 0.126 | 0.947 | 1 | 0.848 |
| Ps | 0 | 0 | 0 | 0.584 | 0.796 | 1 |

Abbreviations: Ph, Physornithinae; RP, Robust Phorusrhacinae; GP, Gracile Phorusrhacinae; Pa; Patagornithinae; M, Mesembriornithine; Ps, Psilopterinae
